# Supplementary material for: Bacterial flagellar capping proteins adopt diverse oligomeric states
Source: eLife. 2016 Sep 24;5:e18857. doi: 10.7554/eLife.18857 (PMC5072837; doi:10.7554/eLife.18857)
Supplement: Figure 1—source data 1. — DOI: http://dx.doi.org/10.7554/eLife.18857.004 [file elife-18857-fig1-data1.xlsx]

## Sheet: Sheet1
	FliD78-405/L4-M4			FliD78-405
Data collection
Space group	P6	P6	P6	P6
Cell dimensions
a,b,c (Å)	124.30, 124.30, 107.19	124.39, 124.39, 107.26	124.37, 124.37, 107.25	124.74, 124.74, 107.01
	Peak	Inflection	Remote
Wavelength (Å)	0.97942	0.97964	0.9184	1.0332
Resolution (Å)	38.09-3.6 (3.69-3.6)	38.06-3.6 (3.69-3.6)	38.1-3.6 (3.69-3.6)	62.4-2.2 (2.26-2.2)
Rmerge	15.1 (53.1)	15.5 (56.3)	13.0 (42.4)	8.5 (370.9)
Rmeas	15.8 (56.2)	16.2 (59.6)	13.6 (44.3)	9.1 (397.5)
I/σ(I)	17.2 (4.5)	16.89 (4.28)	20.75 (6.41)	17.15 (0.55)
CC1/2 (%)	99.6 (90.1)	99.9 (88.9)	99.9 (95.5)	99.9 (12.2)
Wilson B-factor				60.67
Completeness (%)	99.6 (96.6)	99.8 (99.2)	99.8 (98.5)	99.9 (99.2)
Multiplicity (%)	11.8 (9.6)	11.8 (9.6)	11.9 (11.9)	7.7 (7.5)
Refinement
Resolution (Å)				62.4-2.2 (2.28-2.2)
Total reflections				367311 (35785)
Unique refltions				47974 (4759)
Rwork/Rfree (%)				24.92/28.67 (41.54/41.23)
No. of non-hydrogen atoms				3219
Protein				3128
Ligands				3
Water				88
Average B-factor				92.1
Protein				92.7
Ligands				63.2
Solvent				68.2
RMS deviations
Bond lengths (Å)				0.004
Bond angles (°)				0.95
Ramachandran
Most favored (%)				94
Add. allowed (%)				6
Disallowed (%)				0
Clashscore				5.67
PDB code				5FHY
